# Supplementary material for: Autophagy enhanced by curcumin ameliorates inflammation in atherogenesis via the TFEB–P300–BRD4 axis
Source: PubMed Central journal article supplement — Acta Pharm Sin B. 2021 Dec 29;12(5):2280–99. doi: 10.1016/j.apsb.2021.12.014 (PMC9136579; doi:10.1016/j.apsb.2021.12.014), 2021-12-29
Supplement: mmc1.pdf [file mmc1.pdf]

**Supporting Information for**

**Original article**

**Autophagy enhanced by curcumin ameliorates inflammation in atherogenesis *via* the TFE3–p300–BRD4 axis**

**Xuesong Li<sup>a,†</sup>, Ruigong Zhu<sup>a,†</sup>, Hong Jiang<sup>a,†</sup>, Quanwen Yin<sup>a</sup>, Jiaming Gu<sup>a</sup>, Jiajing Chen<sup>a</sup>, Xian Ji<sup>a</sup>, Xuan Wu<sup>a</sup>, Haiping Fu<sup>a</sup>, Hui Wang<sup>a</sup>, Xin Tang<sup>a</sup>, Yuanqing Gao<sup>a</sup>, Bingjian Wang<sup>d,\*</sup>, Yong Ji<sup>a,b,\*</sup>, Hongshan Chen<sup>a,b,c,d,\*</sup>**

<sup>a</sup>*Key Laboratory of Cardiovascular and Cerebrovascular Medicine, School of Pharmacy, Nanjing Medical University, Nanjing 211166, China*

<sup>b</sup>*Key Laboratory of Targeted Intervention of Cardiovascular Disease, Collaborative Innovation Center for Cardiovascular Disease Translational Medicine, Nanjing Medical University, Nanjing 211166, China*

<sup>c</sup>*Department of Cardiothoracic Surgery, the Second Affiliated Hospital of Nanjing Medical University, Nanjing 211166, China*

<sup>d</sup>*Department of Cardiology, Huai'an First People's Hospital Affiliated with Nanjing Medical University, Huai'an 223399, China*

Received 4 September 2021; 13 November 2021; accepted 17 November 2021

<sup>†</sup>These authors made equal contributions to this work.

\*Corresponding authors. Tel.: +86 025 86868467.

E-mail addresses: hongshanchen@njmu.edu.cn (Hongshan Chen), yongji@njmu.edu.cn (Yong Ji), hayywbj@njmu.edu.cn (Bingjian Wang).

**Supporting tables****Table S1** The sequence of siRNAs used in this study.

| Gene name   | No. | 5'→3'                 | 5'→3'                 |
|-------------|-----|-----------------------|-----------------------|
| <i>BRD4</i> | 1   | GCGUUUCCACGGUACCAAATT | UUUGGUACCGUGGAAACGCTT |
|             | 2   | GGAAACCUCAAGCUGAGAATT | UUCUCAGCUUGAGGUUUCCTT |
|             | 3   | CCGUGAUGCUCAGGAGUUUTT | AAACUCCUGAGCAUCACGGTT |
| <i>ATG5</i> | 1   | GGACGAAUUCACUUGUUTT   | AACAAGUUGGAAUUCGUCCTT |
|             | 2   | CCAUCAAUCGGAAACUCAUTT | AUGAGUUUCCGAUUGAUGGTT |
|             | 3   | GGAAGCAGAACCAUACUAUTT | AUAGUAUGGUUCUGCUUCCTT |
| <i>TFEB</i> | 1   | GGCUACAUCAAUCCUGAAATT | UUUCAGGAUUGAUGUAGCCTT |
|             | 2   | GACGAAGGUUCAACAUAATT  | UUGAUGUUGAACCUUCGUCTT |
|             | 3   | CAGGCUGUCAUGCAUUACATT | UGUAAUGCAUGACAGCCUGTT |

**Table S2** Antibodies used in this study.

| Factor or PTM                                      | Vendor                    | Cat. No.   | Dilution for blotting | Vol. for ChIP (μL) |
|----------------------------------------------------|---------------------------|------------|-----------------------|--------------------|
| P62                                                | Cell Signaling Technology | 5114S      | 1:1,000               |                    |
| LC3                                                | Proteintech               | 14600-1-AP | 1:1,000               |                    |
| Actin                                              | Biogot                    | AP0060     | 1:1,000               |                    |
| TFEB                                               | Santa                     | sc-166736  | 1:1,000               | 10                 |
| TFEB                                               | Proteintech               | 13372-1-AP | 1:1,000               |                    |
| p-TFEB                                             | Affinity                  | AF3708     | 1:1,000               |                    |
| PCNA                                               | Cell Signaling Technology | 13110      | 1:1,000               |                    |
| ATG5                                               | Cell Signaling Technology | 12994      | 1:1,000               |                    |
| P300                                               | Abcam                     | ab54984    | 1:1,000               |                    |
| P300                                               | Bethyl                    | A300-358A  |                       | 10                 |
| BRD2                                               | Santa                     | sc-393720  | 1:1,000               |                    |
| BRD2                                               | Cell Signaling Technology | 5848S      |                       | 10                 |
| BRD3                                               | Proteintech               | 11859-1-AP | 1:1,000               | 8                  |
| BRD4                                               | Abcam                     | ab243862   | 1:1,000               | 10                 |
| Histone 3                                          | Abcam                     | ab1791     | 1:1,000               | 8                  |
| mTOR                                               | Cell Signaling Technology | 2972S      | 1:1,000               |                    |
| p-mTOR                                             | Cell Signaling Technology | 2971S      | 1:1,000               |                    |
| Acetylated histone 3                               | Abcam                     | ab4729     | 1:1,000               |                    |
| MED1                                               | Bethyl                    | A300-793A  | 1:1,000               | 5                  |
| AKT                                                | Cell Signaling Technology | 9272       | 1:1,000               |                    |
| p-AKT                                              | Cell Signaling Technology | 4060S      | 1:1,000               |                    |
| Calcineurin                                        | Cell Signaling Technology | 2614       | 1:1,000               |                    |
| S6K1                                               | Cell Signaling Technology | 34475      | 1:1,000               |                    |
| p-S6K1                                             | Cell Signaling Technology | 97596      | 1:1,000               |                    |
| H3K27ac                                            | Abcam                     | ab177178   | 1:1,000               | 8                  |
| H3K4me1                                            | Abcam                     | ab176877   | 1:1,000               |                    |
| H3K27me3                                           | Abcam                     | ab6002     | 1:1,000               |                    |
| H3K9ac                                             | Abcam                     | ab32129    | 1:1,000               |                    |
| H3K14ac                                            | Abcam                     | ab52946    | 1:1,000               |                    |
| H3K18ac                                            | Abcam                     | ab177870   | 1:1,000               |                    |
| H3K23ac                                            | Abcam                     | ab177275   | 1:1,000               |                    |
| BTK                                                | Proteintech               | 21581-1-AP | 1:1,000               |                    |
| p-BTK                                              | Cell Signaling Technology | 5082       | 1:1,000               |                    |
| HRP-conjugated goat anti-rabbit secondary antibody | Jackson Labs              | 111035003  | 1:30,000              |                    |
| HRP-conjugated goat anti-mouse secondary antibody  | Jackson Labs              | 115036003  | 1:30,000              |                    |

**Table S3** RT-PCR primers used in this study.

| Gene name     | Forward sequence          | Reverse sequence          |
|---------------|---------------------------|---------------------------|
| TFEB          | CCGGATGTAATCCACAGAGGC     | AAGGAGCGGCAGAAGAAAGAC     |
| ATG5          | GCTGTGATGAAGAAAGTGTGGTAAA | AATGAATGAGGAAGTAAAAATGGGC |
| BRD4          | CACATCCACCAGAAACCAG       | AGCGAAGACTCCGAAACA        |
| IL-6          | CCTCCAGAACAGATTTGAGAGTAGT | GGGTCAGGGGTGGTTATTGC      |
| TNF- $\alpha$ | AGGACACCATGAGCACTGAAAGC   | AAGGAGAAGAGGCTGAGGAACAAG  |
| IL-1 $\beta$  | GAAATGATGGCTTATTACAGTGGCA | GTAGTGGTGGTCGGAGATTTCGTAG |
| MCP-1         | TAGCAGCCACCTTCATTC        | CTTCTTTGGGACACTTGCT       |
| IL-8          | GACATACTCCAAACCTTTCCACCC  | TTCAAAAACCTTCTCCACAACCCTC |
| Actin         | CTACCTCATGAAGATCCTCACCGA  | TTCTCCTTAATGTACGCACGATT   |

**Table S4** ChIP primers used in this study.

| Primer set name                    | Forward sequence     | Reverse sequence     |
|------------------------------------|----------------------|----------------------|
| IL-1 $\beta$ -(-)1 kb              | AACCGAGACACCAGCAAAGT | GCAGACCTGTCAAAGAGGCA |
| IL-1 $\beta$ -P                    | GAATCCCAGAGCAGCCTGTT | AACAGCGAGGGAGAAACTGG |
| IL-1 $\beta$ -(+)1 kb              | CTACTCCTCCCCTGTCACCA | TTCCAGTGAGACACAGGCTG |
| IL-6(-)1 kb                        | GGCACAGAGAGCAAAGTCCT | CACCTGCTTCAGCCCACTTA |
| IL-6-P                             | CACCCTCACCTCCAACAAA  | TTCTCTTTCGTTCCCGGTGG |
| IL-6-(+)1 kb                       | GGGTCTGAAATCCATGCCCA | CTAGTCCTTCCAAAGCCCGG |
| TNF- $\alpha$ -(-)1 kb (TNF, TNFA) | TCCAGGGCTATGGAAGTCGA | GGTCCTGGAGGCTCTTTCAC |
| TNF- $\alpha$ -P (TNF, TNFA)       | TGCTTGTGTGTCCCAACTT  | CTGCACCTTCTGTCTCGGTT |
| TNF- $\alpha$ -(+)1 kb (TNF, TNFA) | CCTTCTCCCCAACAGTTCCC | ACCGGTAATAACCTACCCC  |
| MCP-1(-)1 kb (CCL2)                | ACTGCTGCCTGCTATGCTAG | TTCCAAATGGGCAGACAGCT |
| MCP-1-P (CCL2)                     | TCTCGCCTCCAGCATGAAAG | CTTGGGGAATGAAGGTGGCT |
| MCP-1-(+)1 kb (CCL2)               | GAGCAAGGGACAAGCCTCAT | GGTGGAGAGTGATGTTGGGG |
| IL-8(-)1 kb (CXCL8)                | CCCTCCACAGTGTGTTTACA | TTCGCTTCTGGGCAAGTACA |
| IL-8-P (CXCL8)                     | CAGAGACAGCAGAGCACACA | CCTTCACACAGAGCTGCAGA |
| IL-8-(+)1 kb (CXCL8)               | CCCCAACAGGTGCAGTTTTG | TGGGGTGGAAAGGTTTGGAG |

Supporting figures

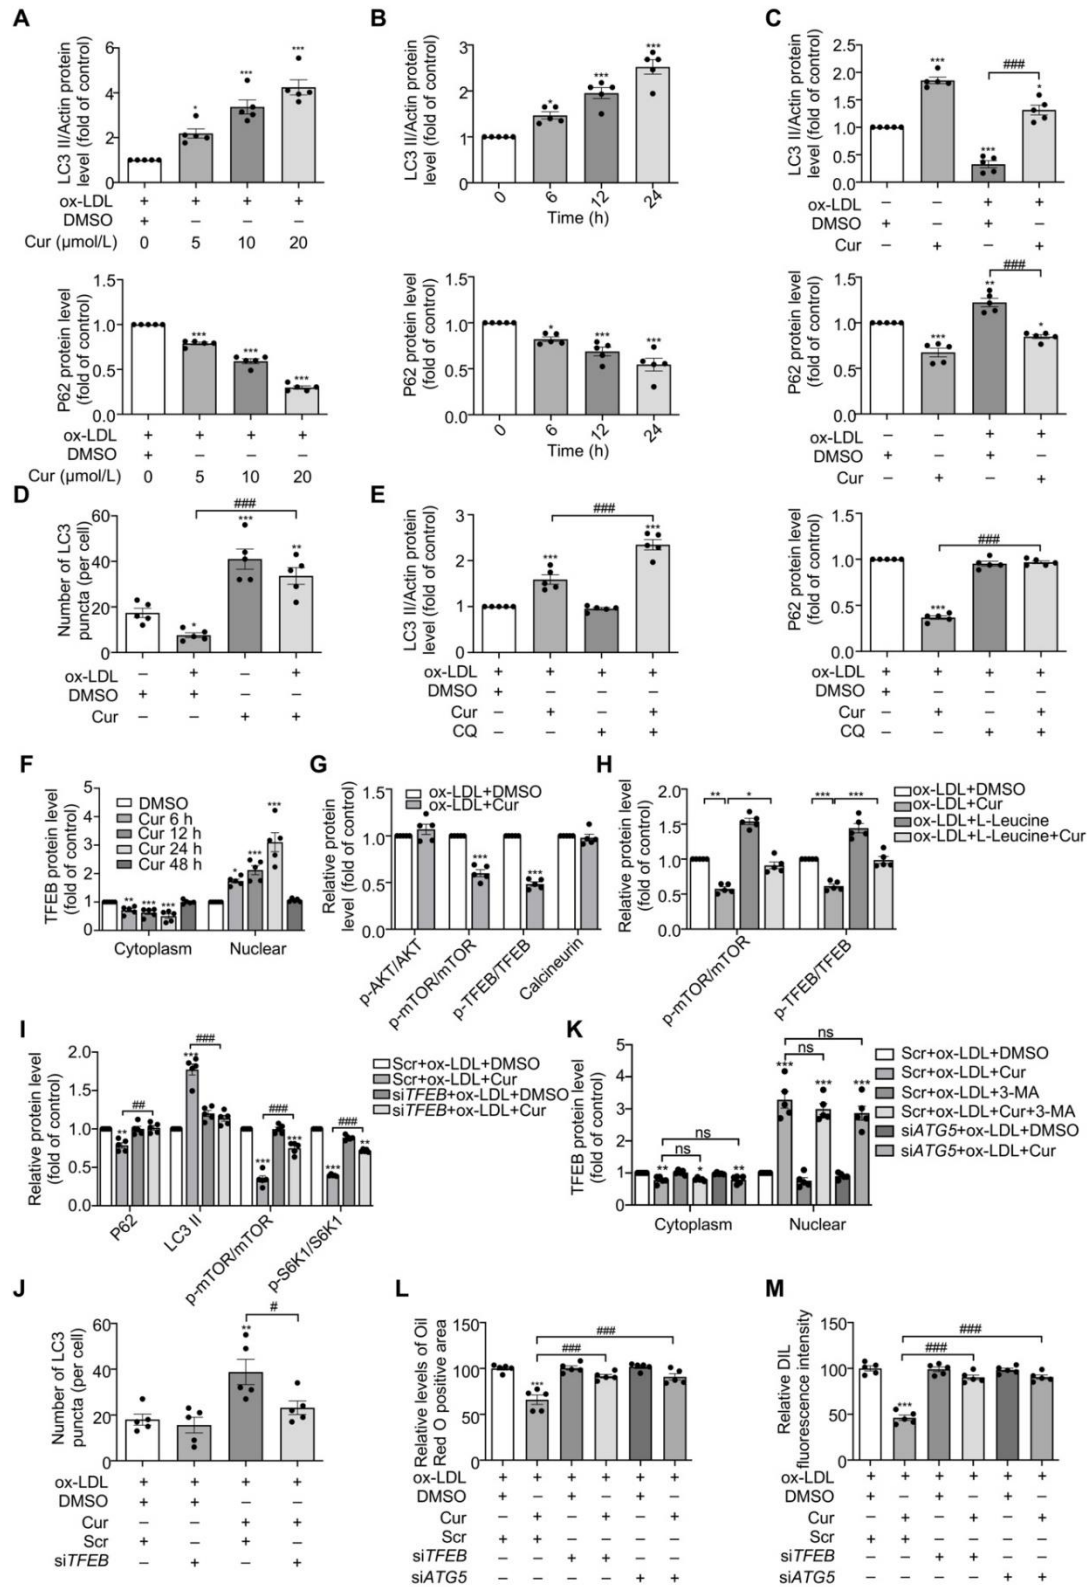

**Figure S1** The statistical graphs of the results in Fig. 1. (A–C) The bar graph of immunoblot analysis of endogenous LC3 II and P62 in foam cells (FCs) treated as in Fig. 1C (A), Fig. 1D (B), Fig. 1E (C). (D) The bar graph of the immunofluorescence staining of LC3 in oxidized low-density lipoprotein (ox-LDL)-treated macrophages challenged with Cur in Fig. 1F. (E) The bar graph of immunoblot analysis of autophagic flux in FCs treated as in Fig. 1G. (F) The bar graph of immunoblot analysis of TFEB subcellular distribution in FCs treated as in Fig. 1H. (G) The bar graph of immunoblot analysis of mTOR/p-mTOR, AKT/p-AKT, calcineurin and TFEB/p-TFEB in FCs treated as in Fig. 1I. (H) The bar graph of immunoblot analysis of the effect of mTORC1 specific agonist L-leucine on the activity of mTOR and TFEB as treated in Fig. 1J. (I) The bar graph of immunoblot analysis of autophagy-related proteins in FCs as treated in Fig. 1K. (J) The bar graph of immunofluorescence analysis of LC3 (green) in FCs as treated in Fig. 1L. (K) The bar graph of immunoblot analysis of the subcellular distribution of TFEB in FCs as treated in Fig. 1M. (L, M) The bar graph of Oil red O staining (ORO) in Fig. 1O (L) and 1,1'-dioctadecyl-3,3,3',3'-tetramethyl-lindocarbocyanine perchlorate labeled oxidized low-density lipoprotein (Dil-ox-LDL) analysis in Fig. 1P (M) in Cur-treated FCs combined with siTFEB or siATG5. Data are expressed as mean  $\pm$  SEM,  $n = 5$ . \* $P < 0.05$ , \*\* $P < 0.01$ , \*\*\* $P < 0.001$ ; # $P < 0.05$ , ## $P < 0.01$ , ### $P < 0.001$ ; ns, no significance.

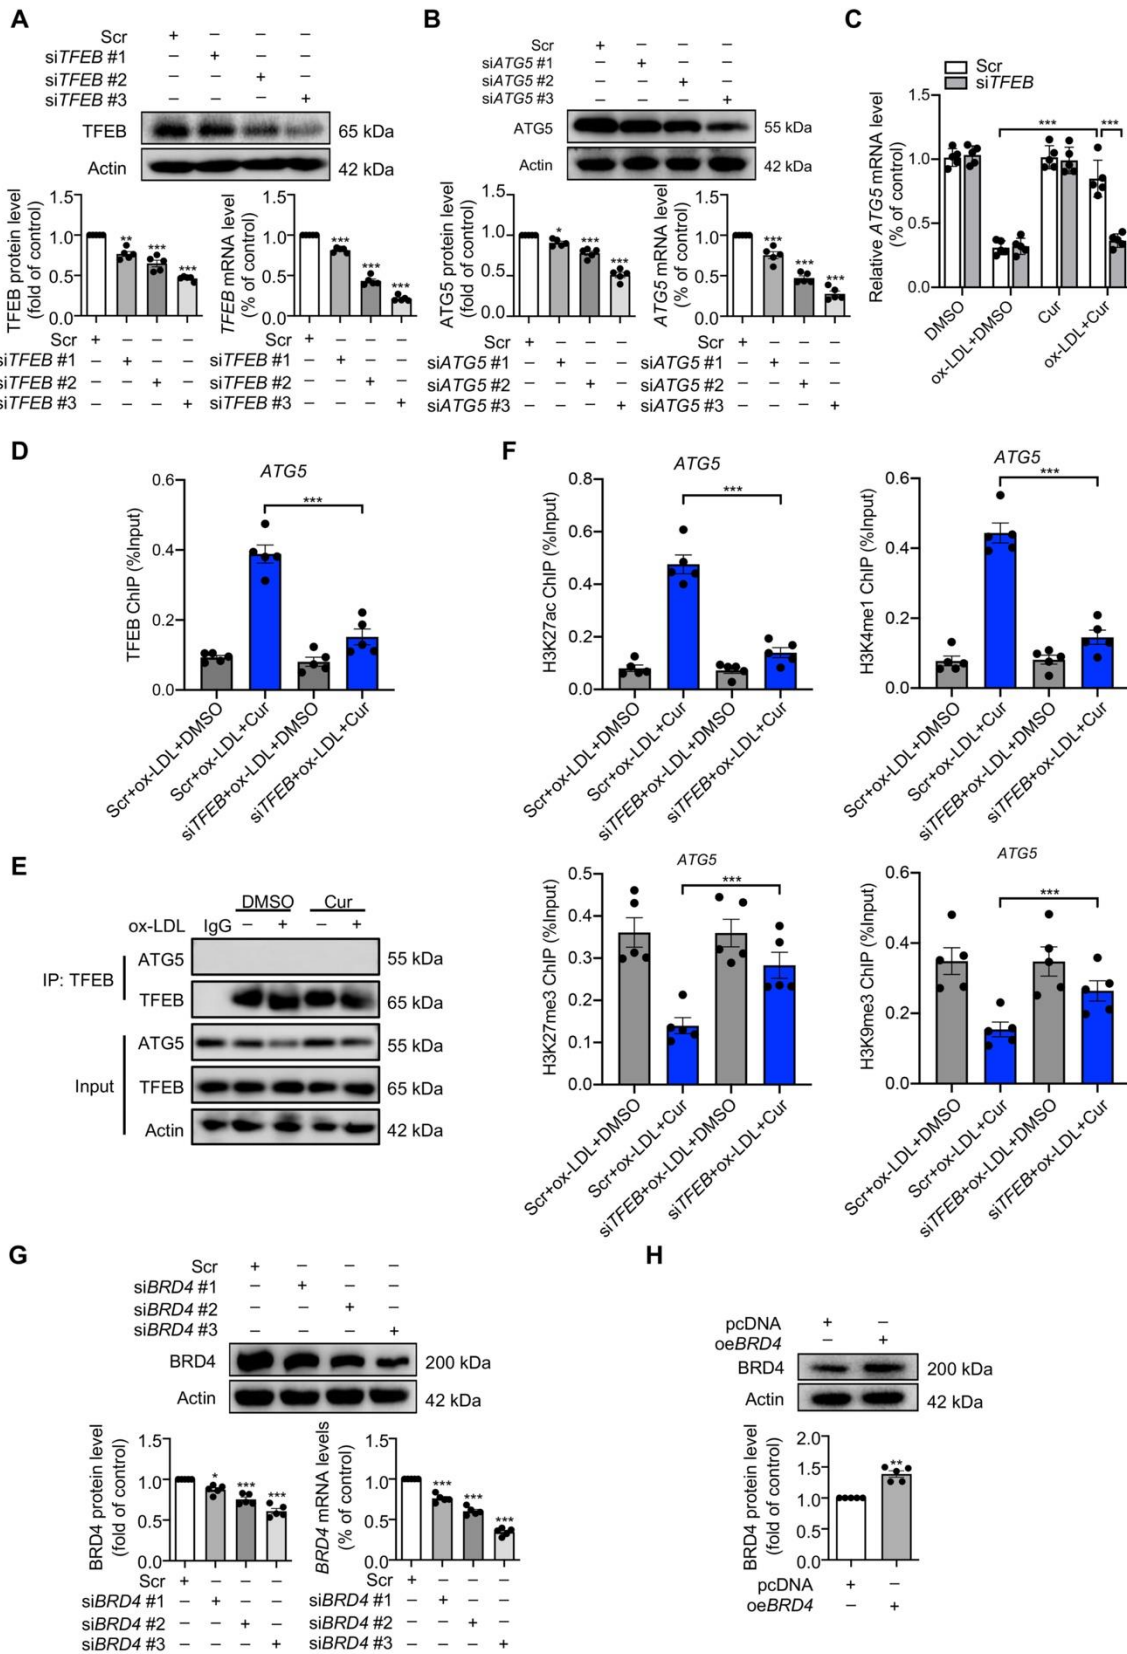

**Figure S2** The interference and overexpression efficiency of proteins, and the interaction between TFEB and ATG5 in FCs treated with Cur. (A, B) Immunoblot and qRT-PCR analysis of interference efficiency targeting *TFEB* (A) and *ATG5* (B) in macrophages. (C) qRT-PCR analysis of the mRNA level of *ATG5* in ox-LDL-treated macrophages in the presence of *siTFEB*. (D) Chromatin immunoprecipitation (ChIP) analysis of the enrichment of TFEB at the promoter of *ATG5* in Cur-treated FCs combined with *siTFEB*. (E) Co-immunoprecipitation analysis of the protein interaction between TFEB and ATG5 in macrophages treated with ox-LDL in the presence of Cur. (F) ChIP analysis of the enrichment of H3K4me1, H3K9me3, H3K27ac and H3K27me3 at the promoter region of *ATG5* in FCs treated with Cur in the presence of *siTFEB*. (G) Immunoblot and qRT-PCR analysis of interference efficiency targeting *BRD4* in macrophages. (H) Immunoblot analysis of the overexpression efficiency targeting BRD4 in macrophages. Data are expressed as mean  $\pm$  SEM,  $n = 5$ . \* $P < 0.05$ , \*\* $P < 0.01$ , \*\*\* $P < 0.001$ .

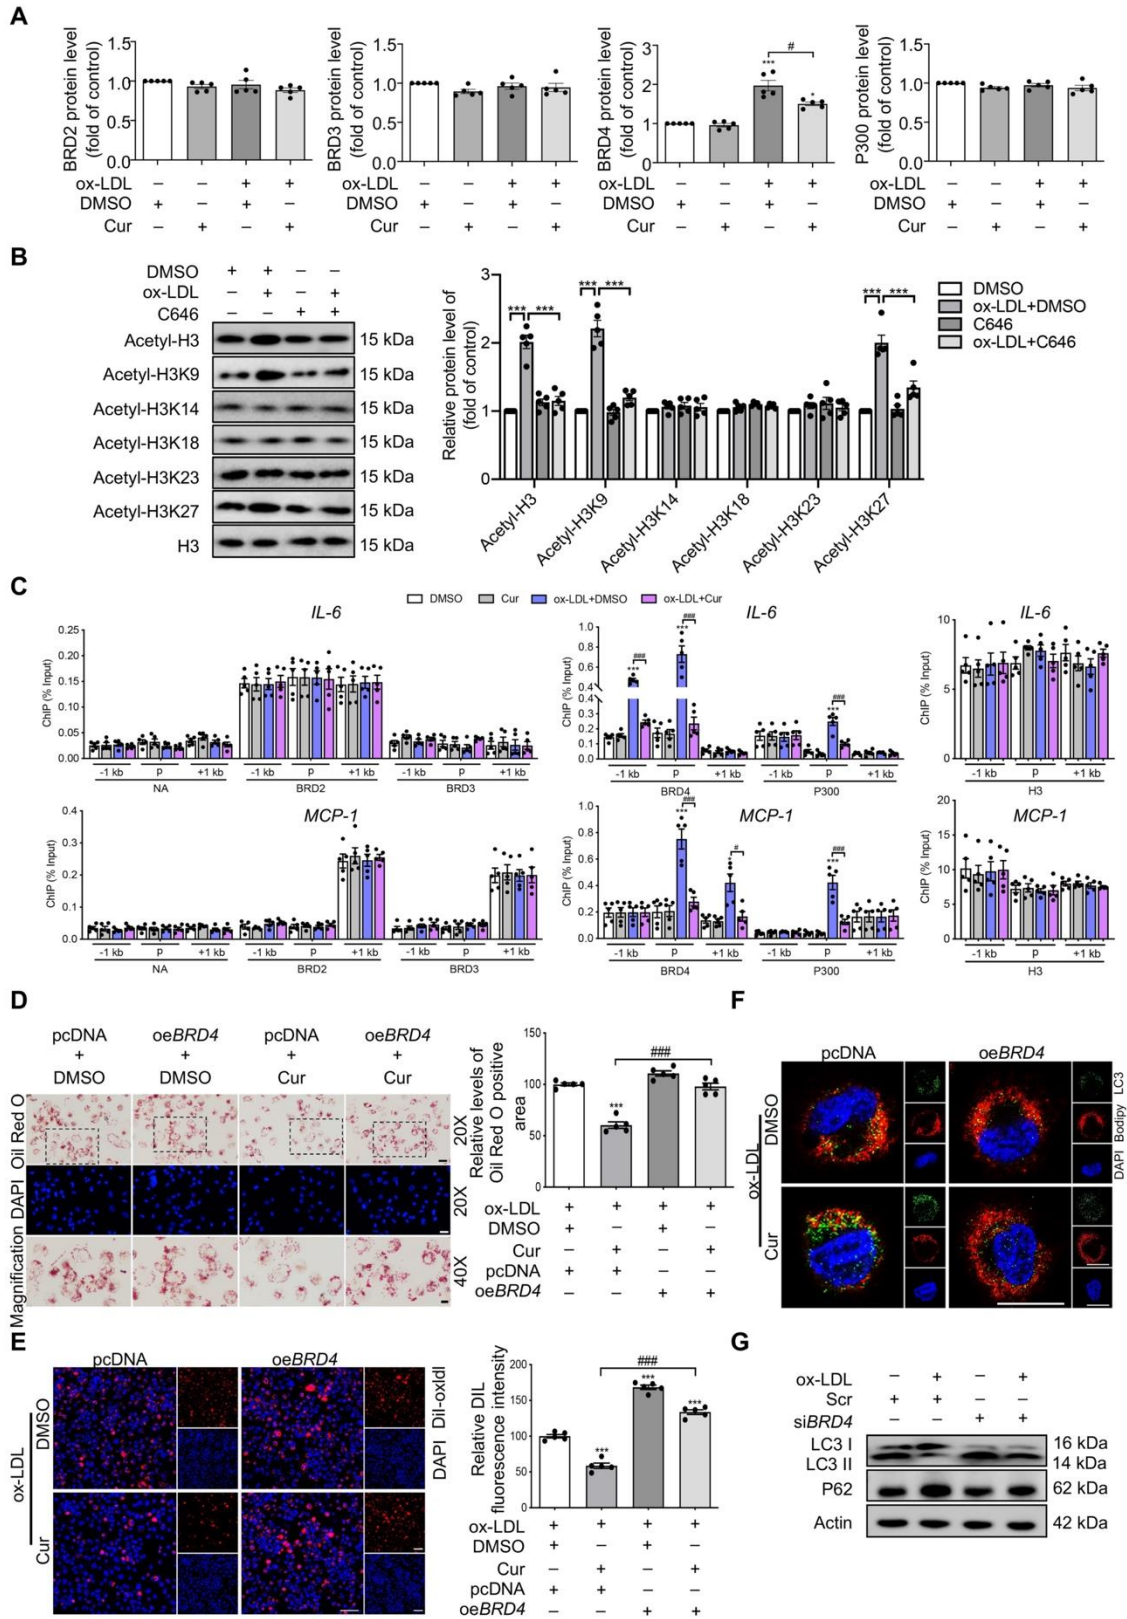



**Figure S3** The histone target of P300 in FCs and the effects of BRD4 overexpression on lipid accumulation in FCs treated with Cur. (A) The bar graph of immunoblot analysis of P300, BRD2, BRD3, BRD4, Actin, Acetyl-H3, and H3 in ox-LDL-treated macrophages combined with Cur treated as in Fig. 2C. (B) Immunoblot analysis of P300 activity in FCs by P300 inhibitor C646. (C) ChIP analysis of the enrichment of P300, BRD2, BRD3, BRD4 and H3 at -1 kb, promoter and +1 kb of *IL-6* and *MCP-1* in Cur-treated FCs. (D-F) The effects of *BRD4* overexpression on lipid accumulation (D), lipid uptake (E) and lipid catabolism (F) in FCs treated with Cur. (G) Immunoblot analysis of the effect of BRD4 on autophagy impairment of FCs by *siBRD4*. Data are expressed as mean  $\pm$  SEM,  $n = 5$ . \* $P < 0.05$ , \*\*\* $P < 0.001$ ; # $P < 0.05$ , ### $P < 0.001$ .

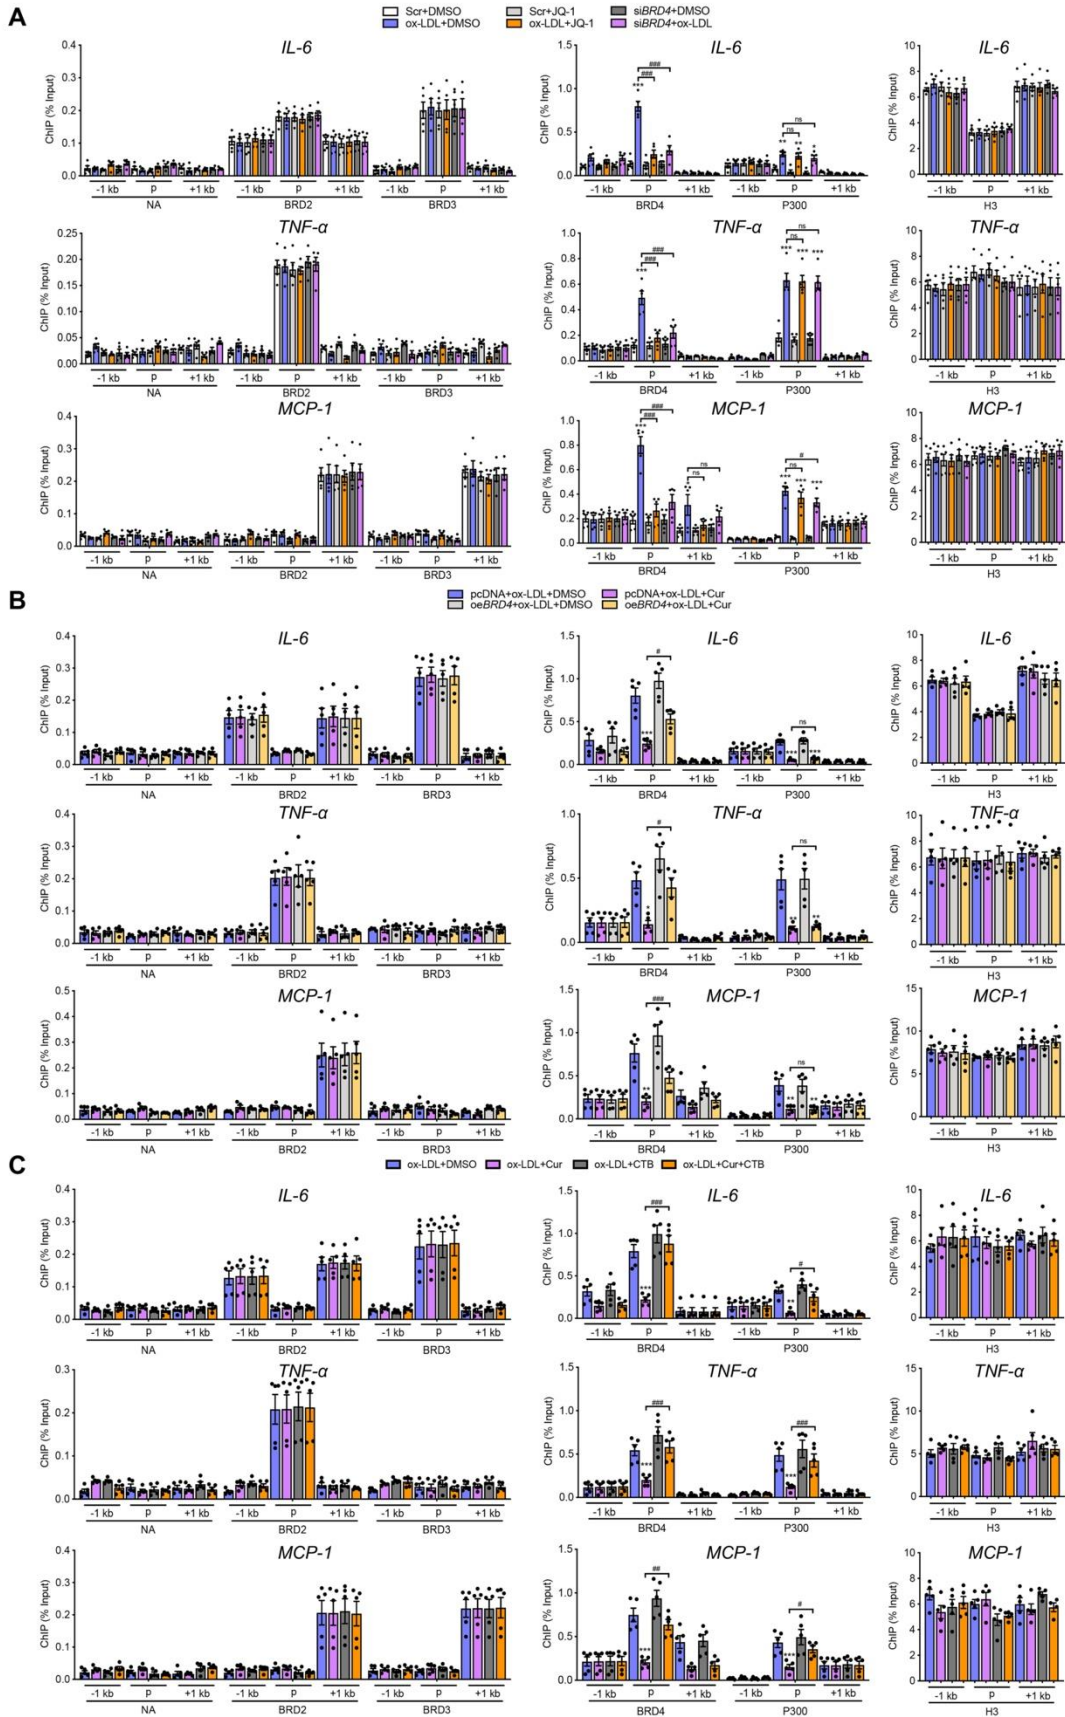

**Figure S4** Epigenetic landscape of P300-BRD4 dependent inflammatory genes in Cur treated FCs. (A) ChIP analysis of the enrichment of P300, BRD2, BRD3, BRD4 and H3 at -1 kb, promoter and +1 kb of *IL-6*, *TNF- $\alpha$*  and *MCP-1* in ox-LDL-treated macrophages combined with JQ-1 or si*BRD4*. (B, C) The enrichment of P300, BRD2, BRD3, BRD4 and H3 at -1 kb, promoter and +1 kb of *IL-6*, *TNF- $\alpha$*  and *MCP-1* in ox-LDL-treated macrophage combined with Cur in the presence of oe*BRD4* (B) or CTB (C) was measured by ChIP. Data are expressed as mean  $\pm$  SEM,  $n = 5$ . \* $P < 0.05$ , \*\* $P < 0.01$ , \*\*\* $P < 0.001$ ; # $P < 0.05$ , ## $P < 0.01$ , ### $P < 0.001$ ; ns, no significance.

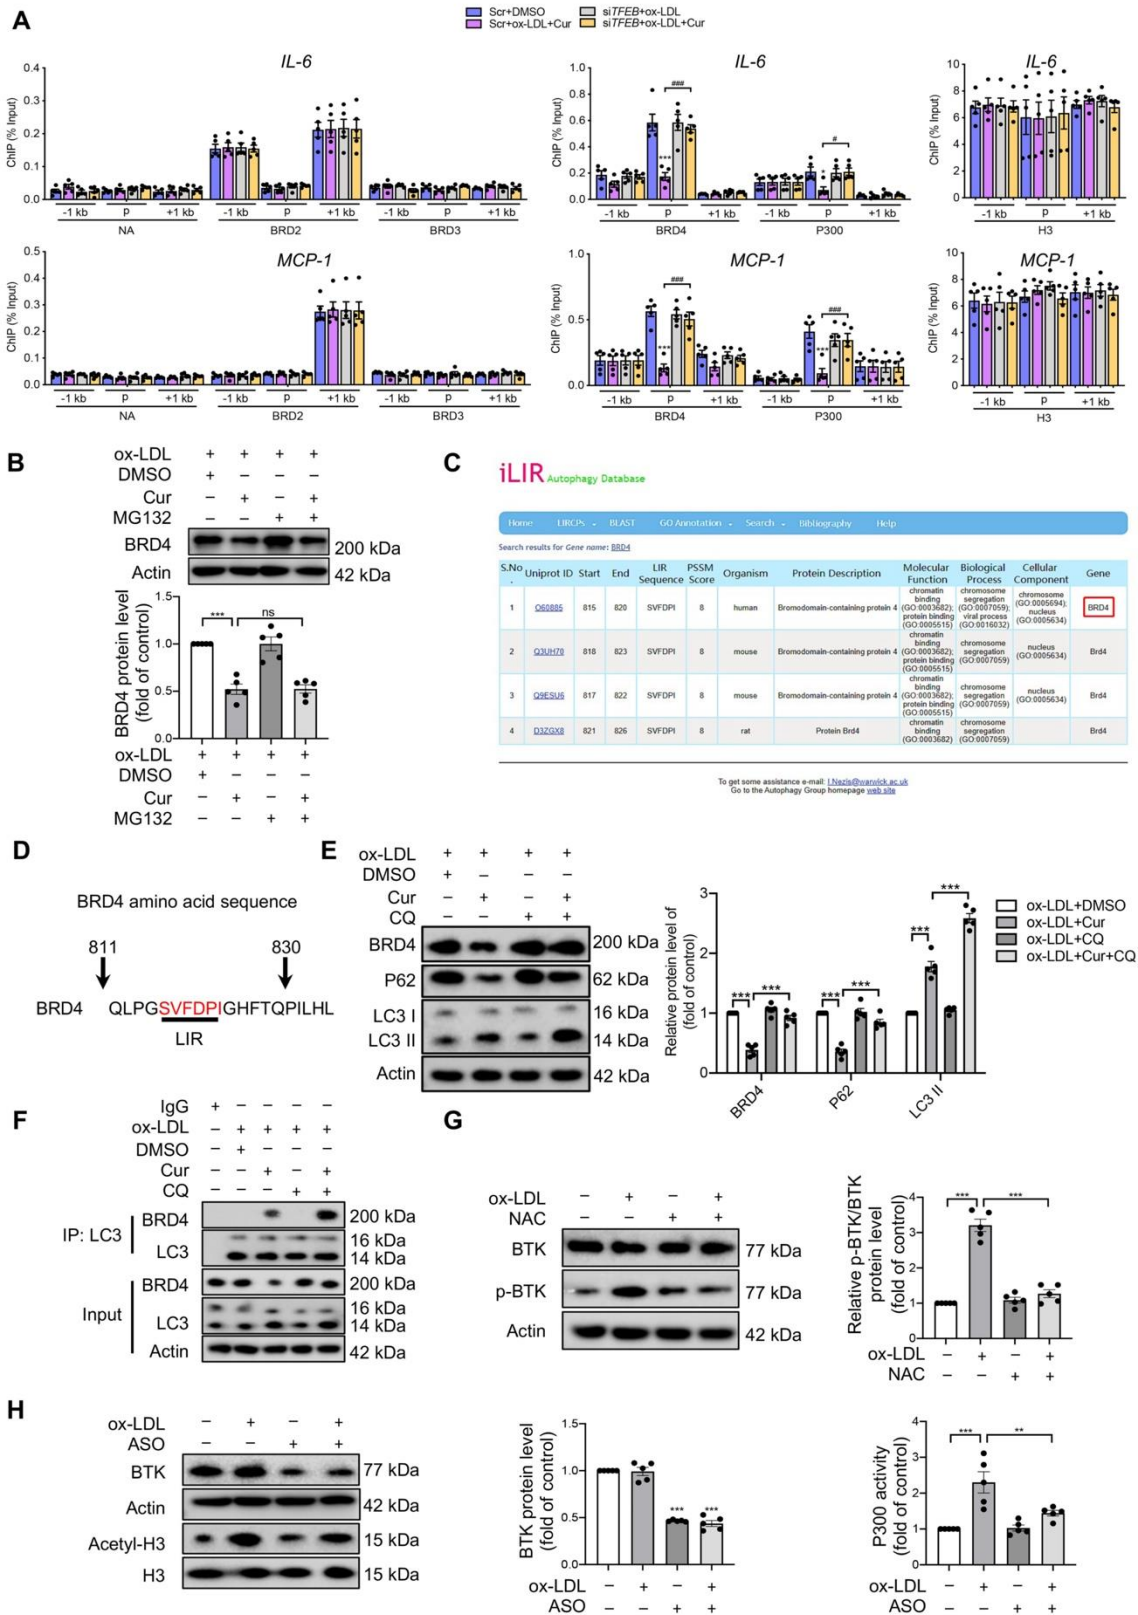

**Figure S5** Cur promotes the degradation of BRD4 by autophagy in FCs and the mechanism underlying ROS activating P300 in FCs. (A) ChIP analysis of the enrichment of P300, BRD2, BRD3, BRD4 and H3 at -1 kb from the promoter, at the promoter, and at +1 kb of *IL-6* and *MCP-1* in Cur-treated FCs combined with si*TFEB*. (B) Immunoblot analysis of BRD4 in Cur-treated FCs in the presence of proteasome inhibitor MG132 (10  $\mu$ mol/L). (C) The iLIR autophagy database shows that BRD4 has LIR motif. (D) The amino acid sequence of BRD4 including LIR motif which is shown in red. (E) Immunoblot analysis of BRD4 in Cur-treated FCs in the presence of autophagic flux inhibitor CQ. (F) Co-immunoprecipitation analysis of the protein interaction between BRD4 and LC3 in Cur-treated FCs in the presence of CQ. (G) Immunoblot analysis of BTK, p-BTK in macrophage treated with ox-LDL in the presence of ROS scavenger NAC. (H) Immunoblot analysis of BTK, Actin, acetyl-H3 and H3 in macrophage treated with ox-LDL in the presence of BTK antisense oligonucleotides (ASO). Data are expressed as mean  $\pm$  SEM,  $n = 5$ . \* $P < 0.05$ , \*\* $P < 0.01$ , \*\*\* $P < 0.001$ ; # $P < 0.05$ , ### $P < 0.001$ .

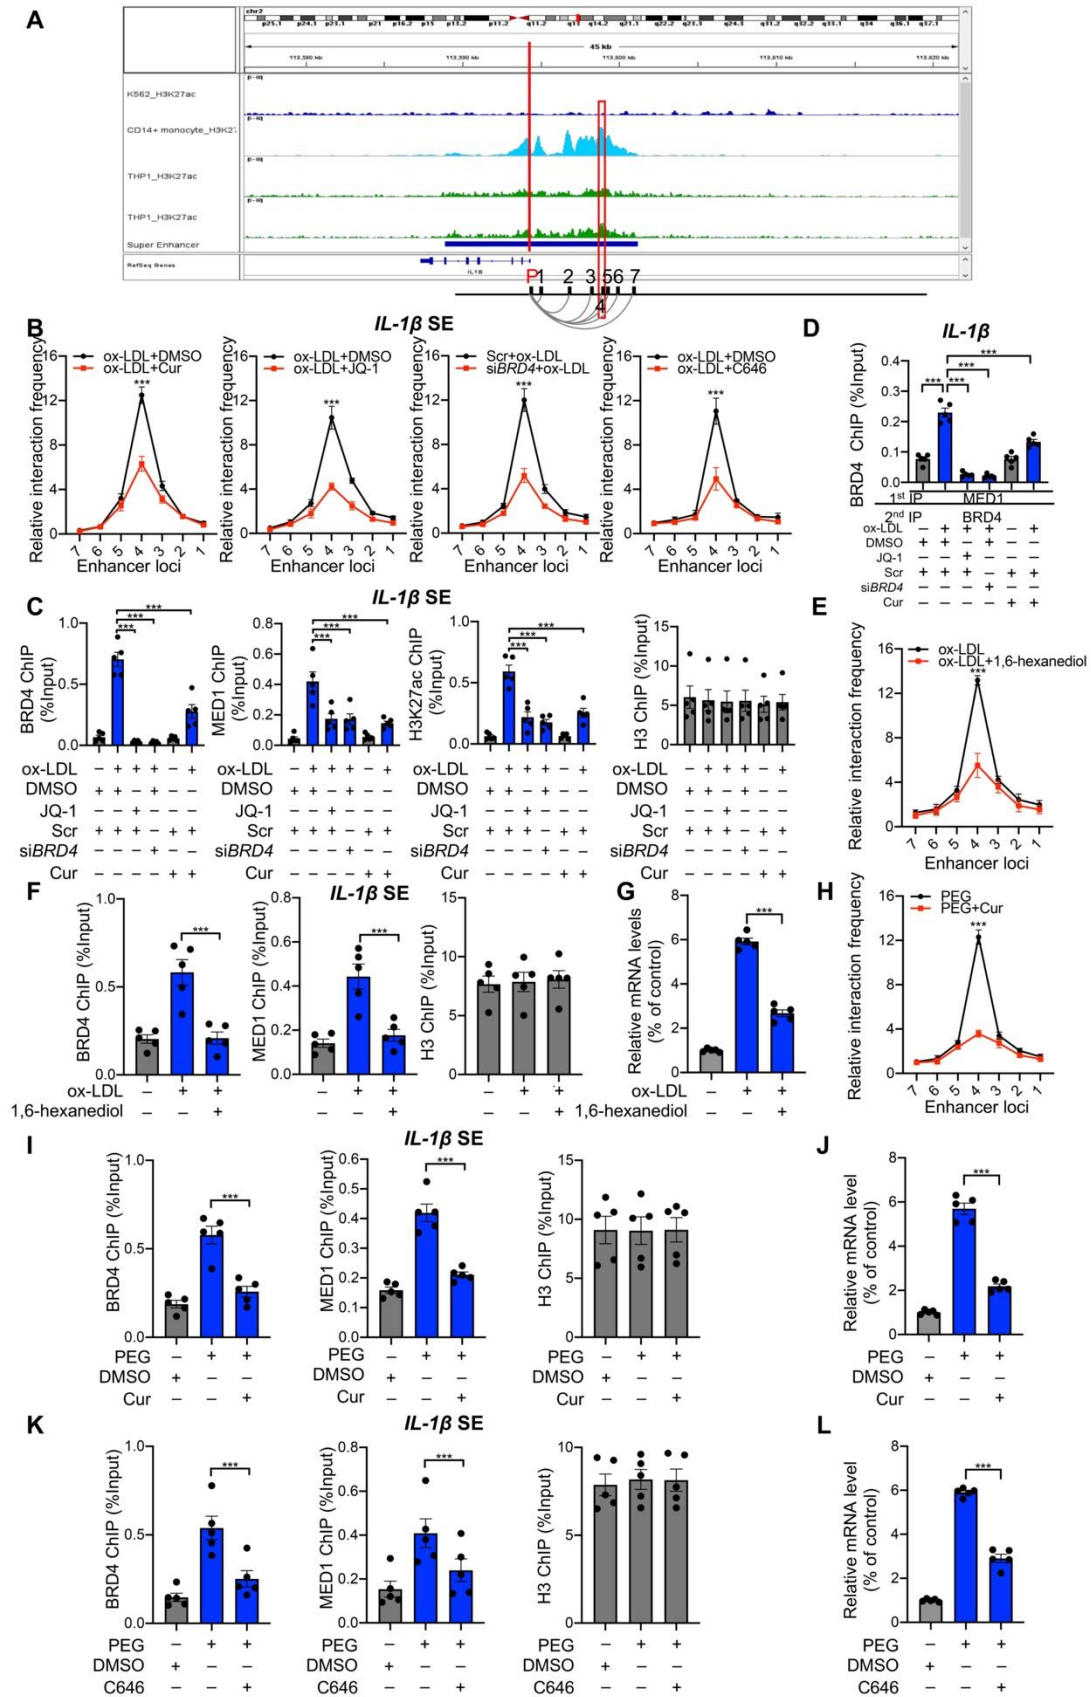

**Figure S6** Cur regulates BRD4-dependent super-enhancer (SE) associated with phase separation on *IL-1 $\beta$* . (A) ChIP-seq peaks (H3K27ac levels) and putative SE location (highlighted by the red box) around *IL-1 $\beta$* . Cell lines marked with different colors: K562 in blue, CD14-positive monocyte in light blue, THP-1 in green. The putative SE region is marked as the horizontal line in blue. (B) 3C-qPCR analysis of the long-distance interactions between *IL-1 $\beta$*  promoter and seven enhancer loci (the positions of different loci were described as Fig. S6A) in FCs after different treatments (*x*-axis means seven enhancer loci of *IL-1 $\beta$*  promoter). (C) The enrichment of BRD4, MED1, and H3K27ac at the SE region of *IL-1 $\beta$*  in Cur-treated FCs combined with JQ-1, siBRD4 or Cur was measured by ChIP, as well as H3. (D) Re-ChIP was performed with 1st round pull-down of MED1 antibody and 2nd round pull-down of the BRD4 antibody. (E) 3C-qPCR analysis of the long-distance interactions between *IL-1 $\beta$*  promoter and seven enhancer loci (the positions of different loci were described as Fig. S6A) in FCs treated with 1,6-hexanediol (*x*-axis means seven enhancer loci of *IL-1 $\beta$*  promoter). (F) ChIP analysis of the enrichment of BRD4 and MED1 at the SE region of *IL-1 $\beta$*  in ox-LDL-treated macrophages combined with 3% 1,6-hexanediol, as well as H3. (G) The relative *IL-1 $\beta$*  mRNA level in ox-LDL-treated macrophages combined with 3% 1,6-hexanediol. (H–L) Meanwhile, the macrophages were treated with PEG combined with Cur or P300 inhibitor C646. We detected the long-distance interactions between *IL-1 $\beta$*  promoter and seven enhancer loci in macrophages treated with phase separation crowder PEG and Cur using 3C-qPCR (*x*-axis means seven enhancer loci of *IL-1 $\beta$*  promoter) (H), the enrichment of BRD4 and MED1 at the SE region of *IL-1 $\beta$*  using ChIP (I, K), and the relative *IL-1 $\beta$*  mRNA level using qRT-PCR (J, L). Data are expressed as mean  $\pm$  SEM, *n* = 5. \*\*\**P* < 0.001.

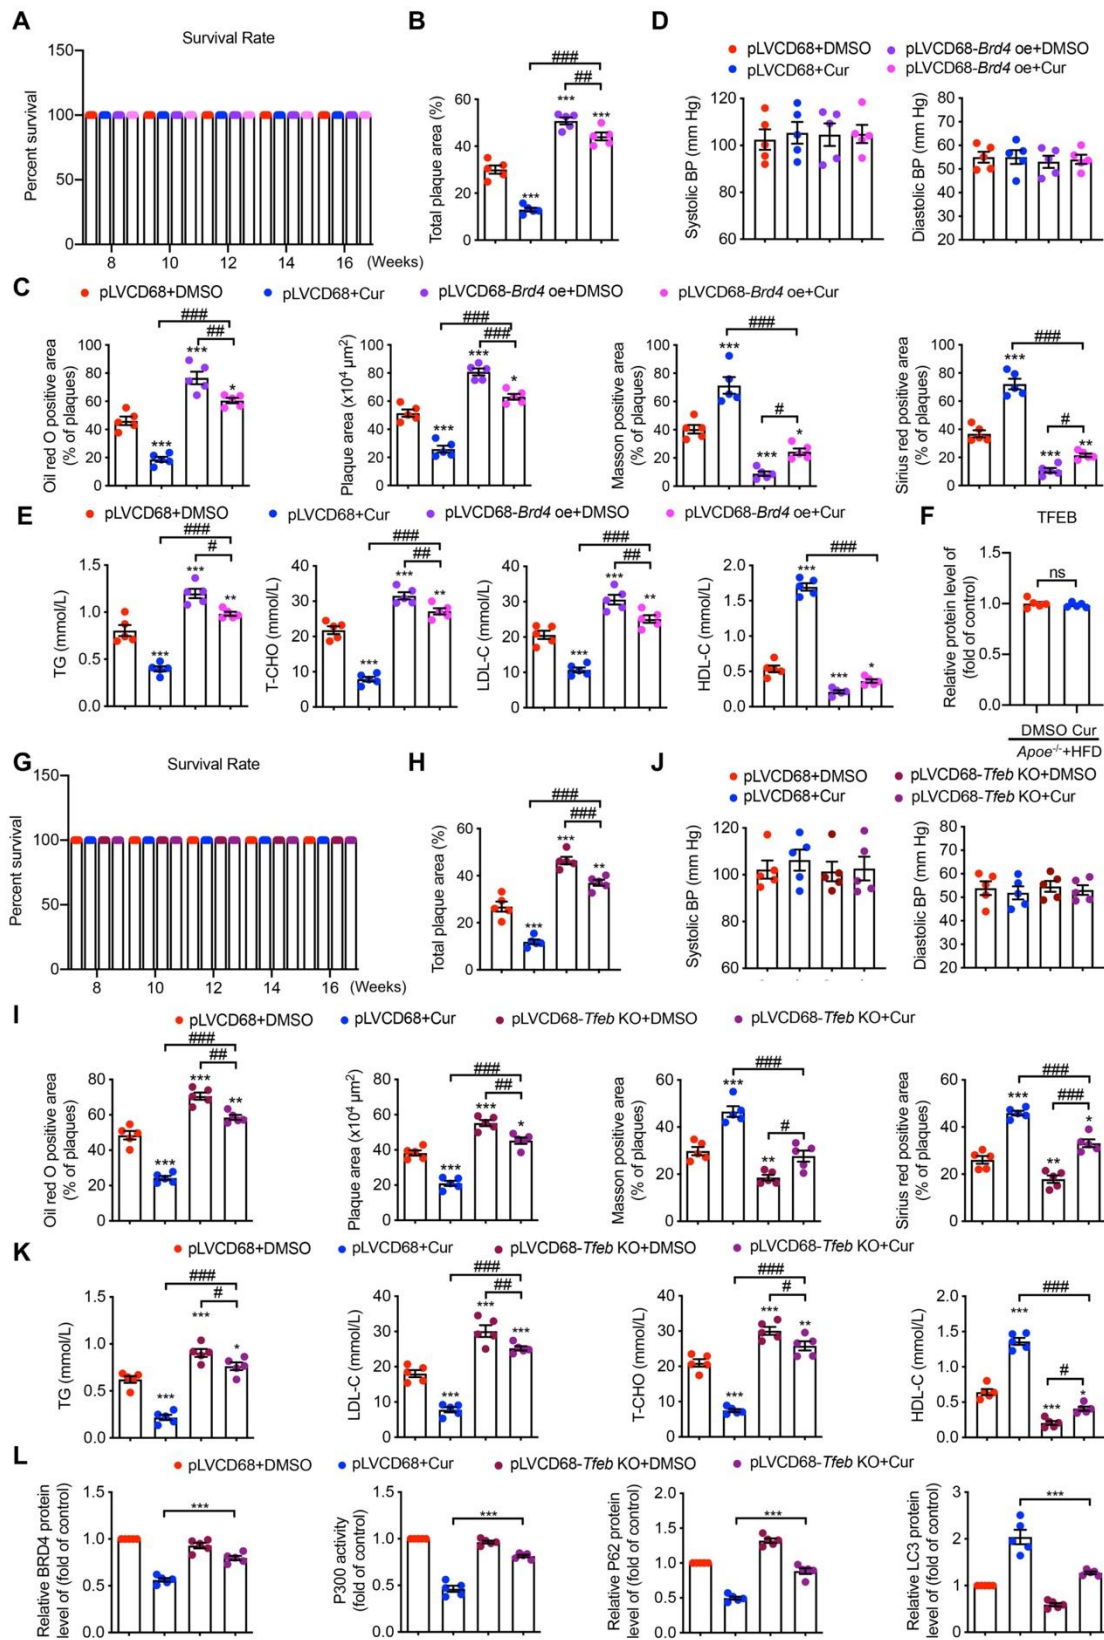



**Figure S7** The statistical graphs of the results in Fig. 7. (A) The survival rate of *Apoe*<sup>-/-</sup> mice with or without the transplantation of the pLVCD68-*Brd4* overexpression (*Brd4* oe) transduced bone marrow cells (BMCs) combined with Cur. (B) The statistical graph of total plaque area in *Apoe*<sup>-/-</sup> mice treated as in Fig. 7C. (C) The statistical graph of Oil red O, hematoxylin and eosin, Sirius red and Masson's trichrome staining of the cross-section of the aorta from *Apoe*<sup>-/-</sup> mice treated as in Fig. 7D. (D) The blood pressure of *Apoe*<sup>-/-</sup> mice treated as in Fig 7C. (E) The plasma lipids of *Apoe*<sup>-/-</sup> mice treated as in Fig. 7C. (F) The bar graph of immunoblot analysis of TFEB in *Apoe*<sup>-/-</sup> mice fed with a HFD and treated with Cur treated as in Fig. 7F. (G) The survival rate of *Apoe*<sup>-/-</sup> mice with or without the transplantation of the pLVCD68-*Tfeb* knockout (*Tfeb* KO) transduced BMCs combined with Cur. (H) The statistical graph of total plaque area in *Apoe*<sup>-/-</sup> mice treated as in Fig. 7H. (I) The statistical graph of Oil red O, hematoxylin and eosin, Masson's trichrome and Sirius red staining of the cross-section of the aorta from *Apoe*<sup>-/-</sup> mice treated as in Fig. 7H. (J) The blood pressure of *Apoe*<sup>-/-</sup> mice treated as in Fig. 7H. (K) The plasma lipids of *Apoe*<sup>-/-</sup> mice treated as in Fig. 7H. (L) The bar graph of immunoblot analysis of LC3 II, P62, BRD4, and P300 activity in aortas treated as in Fig. 7L. Data are expressed as mean ± SEM, *n* = 5. \**P* < 0.05, \*\**P* < 0.01, \*\*\**P* < 0.001; #*P* < 0.05, ##*P* < 0.01, ###*P* < 0.001.
